# Supplementary material for: The expansion of heterochromatin blocks in rye reflects the co-amplification of tandem repeats and adjacent transposable elements
Source: PubMed Central journal article supplement (PMC4857426; doi:10.1186/s12864-016-2667-5), 2016-05-04
Supplement: 12864_2016_2667_MOESM1_ESM.pdf [file 12864_2016_2667_MOESM1_ESM.pdf]

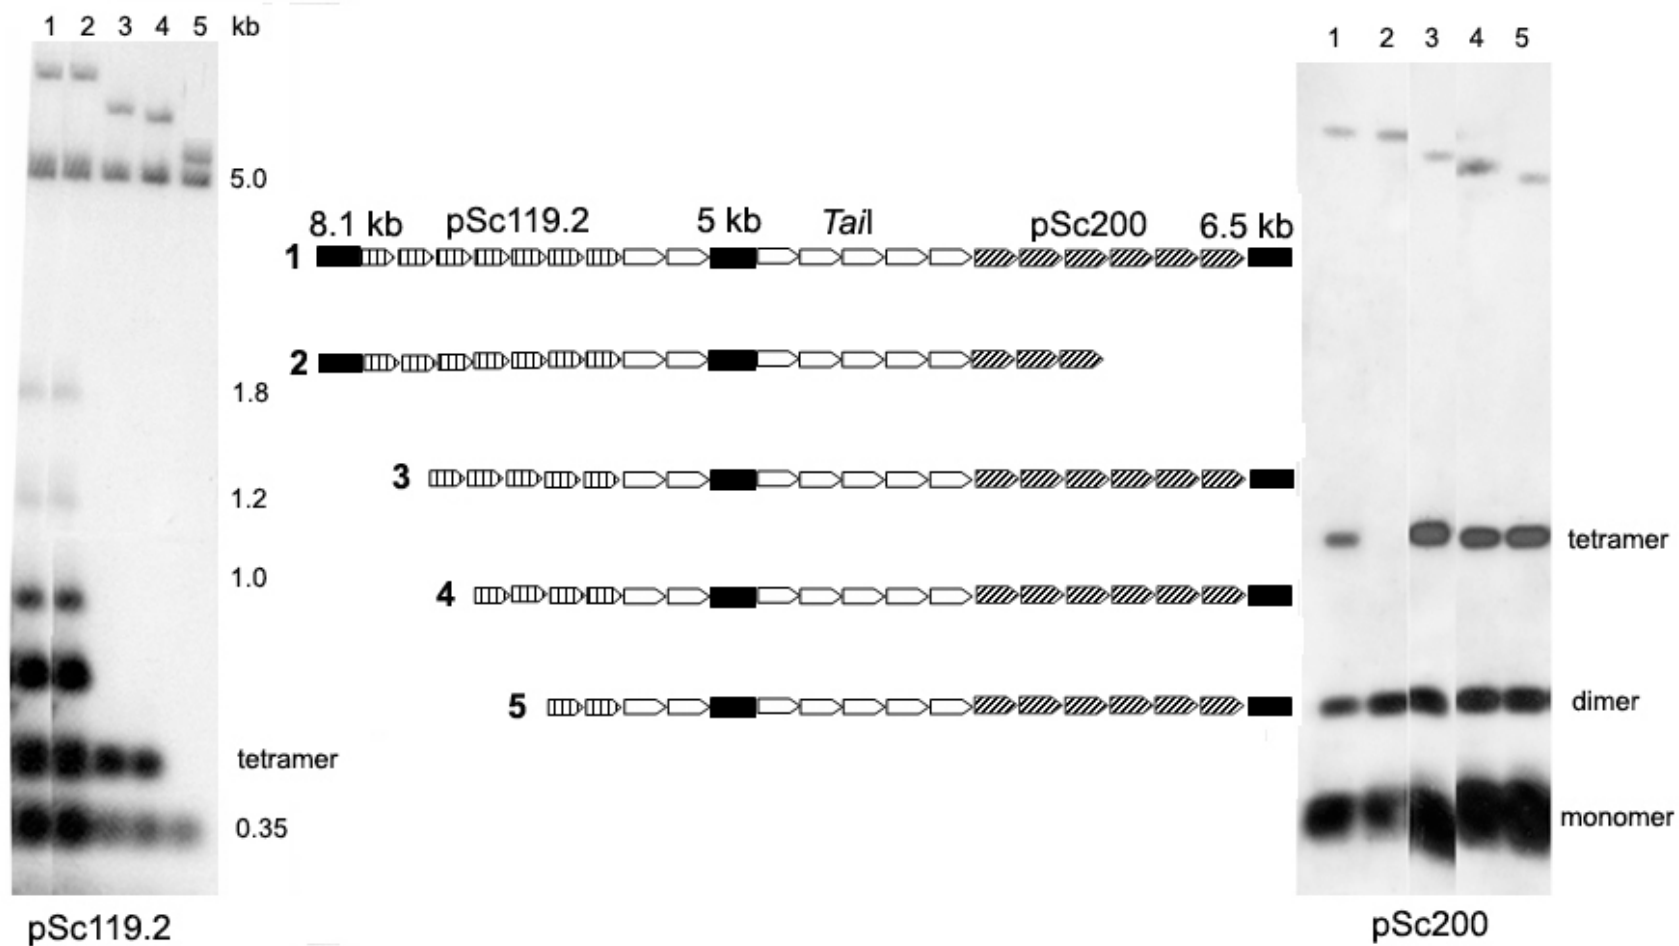

**Additional file 1. Multimeric repeat units present in the central portion of the arrays.**

PFGE separation of BAC clones containing pSc119.2, *Tai*I and pSc200 arrays. Southern hybridization probed with (left panel) pSc119.2 and (right panel) pSc200. Lane 1: BAC clone 84C15, lane 2: 130H7, lane 3: 230C21, lane 4: 230N4, lane 5: 241H2. The central panel illustrates the structure of the BAC clones. Black rectangles: non-array sequences.
