# Supplementary material for: The expansion of heterochromatin blocks in rye reflects the co-amplification of tandem repeats and adjacent transposable elements
Source: PubMed Central journal article supplement (PMC4857426; doi:10.1186/s12864-016-2667-5), 2016-05-04
Supplement: 12864_2016_2667_MOESM4_ESM.pdf [file 12864_2016_2667_MOESM4_ESM.pdf]

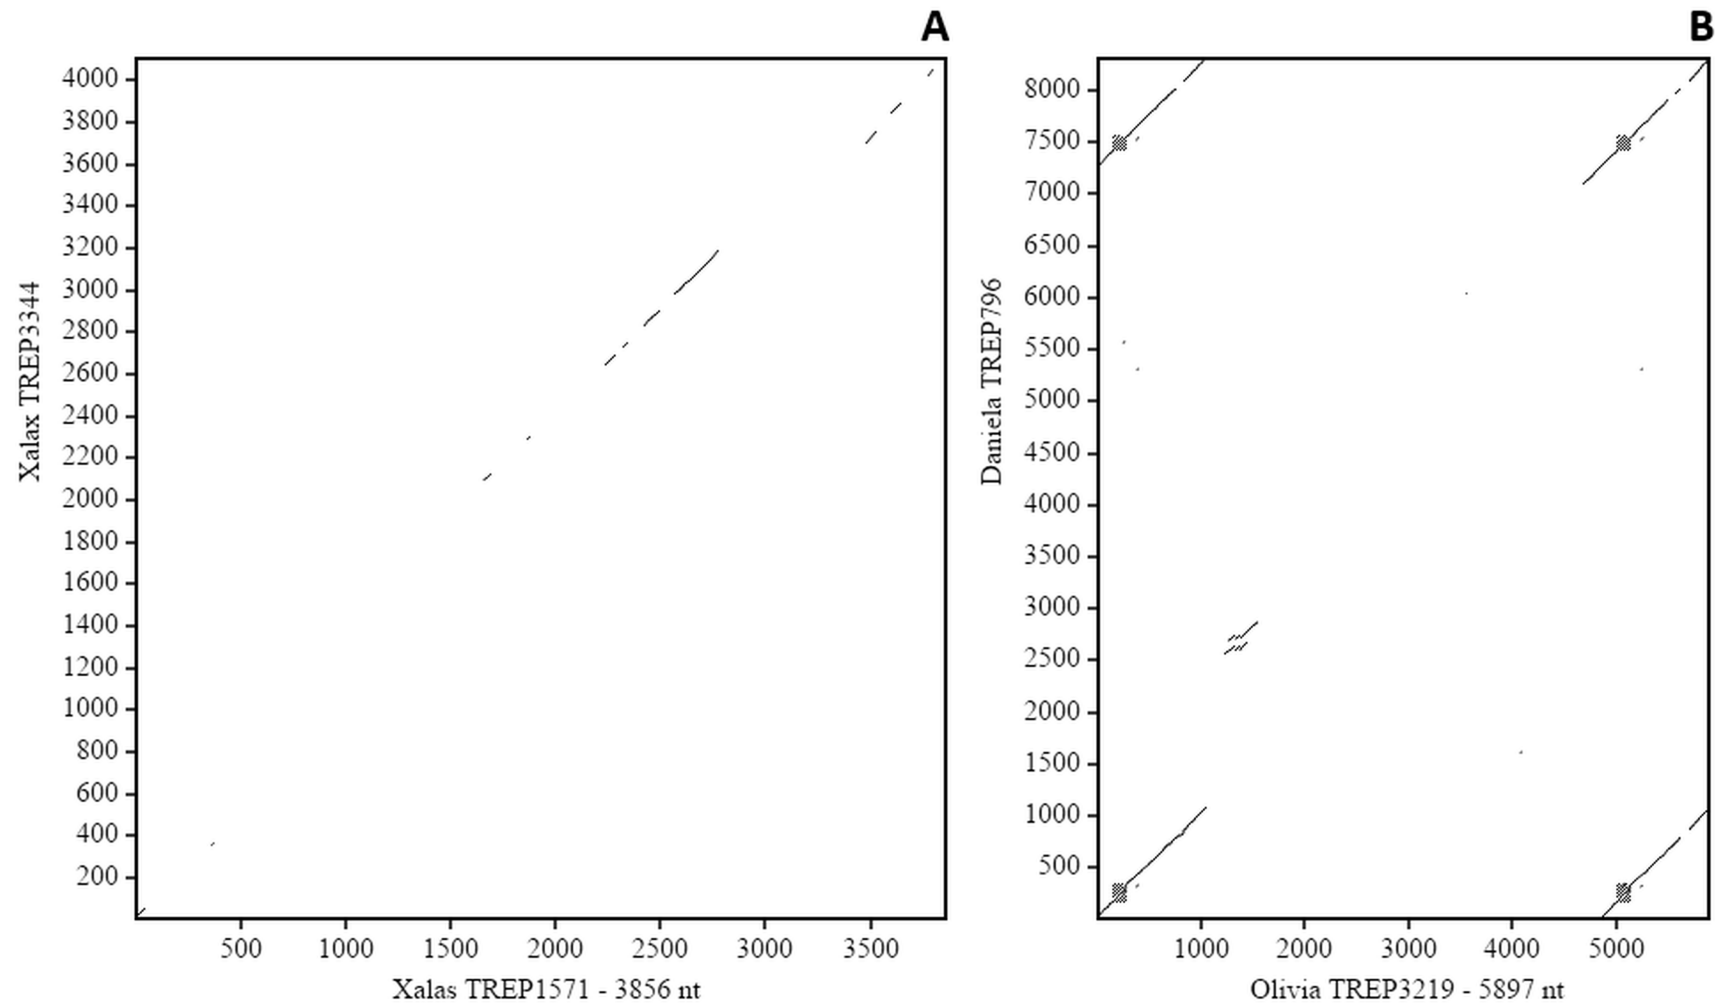

**Additional file 2. Dot-plot alignment of TE sequences most highly enriched in the TE/tandem array junctions.**

**(A)** *Xalas* (TREP1571) vs *Xalax* (TREP3344), **(B)** *Olivia* (TREP3219) vs *Daniela* (TREP796).

Lines indicate regions of sequence homology.
