# Supplementary material for: The expansion of heterochromatin blocks in rye reflects the co-amplification of tandem repeats and adjacent transposable elements
Source: PubMed Central journal article supplement (PMC4857426; doi:10.1186/s12864-016-2667-5), 2016-05-04
Supplement: 12864_2016_2667_MOESM5_ESM.pdf [file 12864_2016_2667_MOESM5_ESM.pdf]

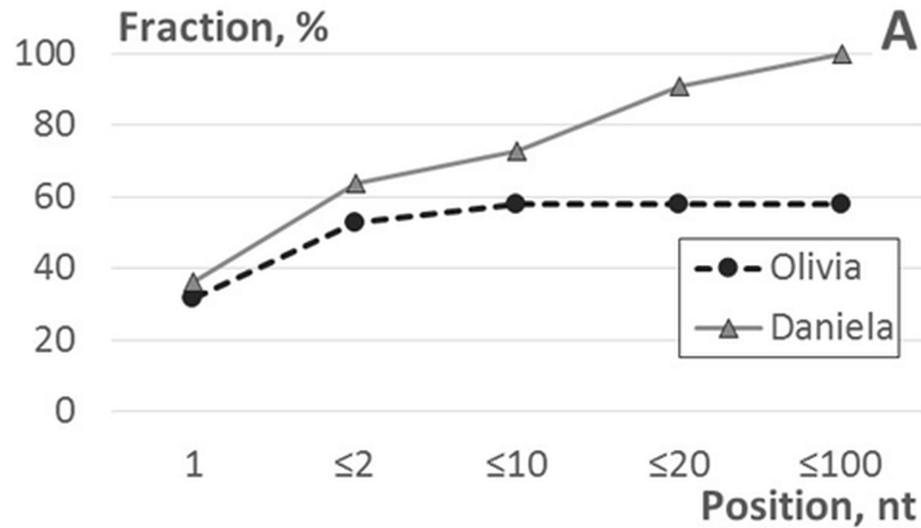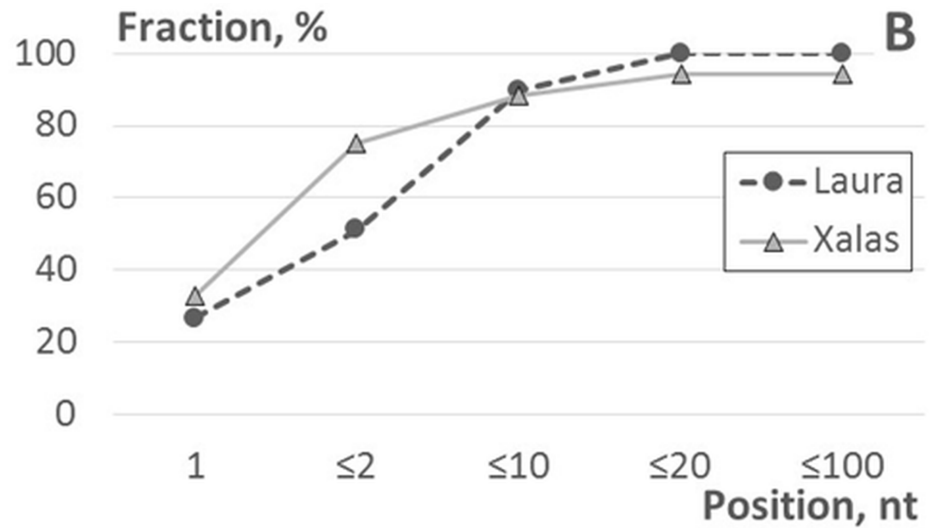

**Additional file 3. Distribution of distances (shown in nt) between the terminal monomer of the tandem array and the TE present at the TE/tandem array junction (X-axis).**

**(A)** TE/pSc200 junctions, **(B)** TE/pSc250 junctions. The Y-axis plots the ration between the number of junctions harboring a given size of spacer DNA and the total number of junctions harboring the same TE.
