# Supplementary material for: The expansion of heterochromatin blocks in rye reflects the co-amplification of tandem repeats and adjacent transposable elements
Source: PubMed Central journal article supplement (PMC4857426; doi:10.1186/s12864-016-2667-5), 2016-05-04
Supplement: 12864_2016_2667_MOESM6_ESM.pdf [file 12864_2016_2667_MOESM6_ESM.pdf]

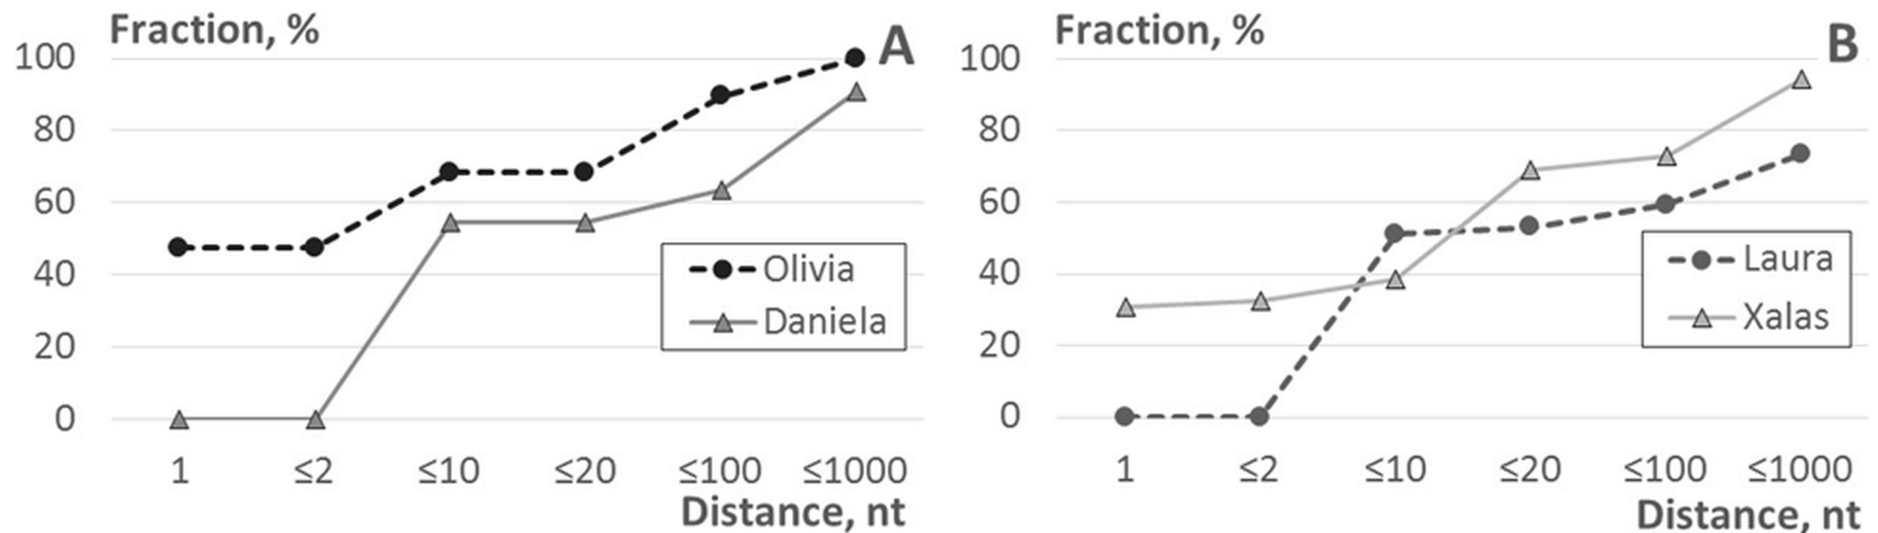

**Additional file 4. Distribution of distances (shown in nt) between the first nucleotide of the TE and the closest full length TE (5'- or 3'-end) present at the TE/tandem array junction (x-axis). (A) TE/pSc200 junctions, (B) TE/pSc250 junctions. The y-axis plots the ratio between the number of junctions harboring a given size of spacer DNA and the total number of junctions harboring the same TE.**
